# Supplementary material
Source: PubMed Central journal article supplement (PMC9995602)
Supplement: NIHMS1841862-supplement-Supp1.pdf [file NIHMS1841862-supplement-Supp1.pdf]

**Supplemental Table 1. Mixed model analysis of OCT and OCTA parameters associated with logMAR visual acuity based on glaucoma severity**

| Variables                                               | Early glaucoma                   |         |                           |         |                                     |         | Moderate-advanced glaucoma       |              |                           |         |                                     |                  |
|---------------------------------------------------------|----------------------------------|---------|---------------------------|---------|-------------------------------------|---------|----------------------------------|--------------|---------------------------|---------|-------------------------------------|------------------|
|                                                         | Superficial VD<br>(per 1% lower) |         | Deep VD<br>(per 1% lower) |         | GCC thickness<br>(per 1 um thinner) |         | Superficial VD<br>(per 1% lower) |              | Deep VD<br>(per 1% lower) |         | GCC thickness<br>(per 1 um thinner) |                  |
|                                                         | $\beta$ , 95 % CI                | P value | $\beta$ , 95 % CI         | P value | $\beta$ , 95 % CI                   | P value | $\beta$ , 95 % CI                | P value      | $\beta$ , 95 % CI         | P value | $\beta$ , 95 % CI                   | P value          |
| Corrected FAZ area,<br>per 0.1 mm <sup>2</sup> increase | 0.005<br>(-0.014, 0.024)         | 0.605   |                           |         |                                     |         | 0.022<br>(0.001, 0.044)          | <b>0.037</b> |                           |         |                                     |                  |
| FAZ circumference,<br>per 1mm increase                  | 0.014<br>(-0.028, 0.057)         | 0.500   |                           |         |                                     |         | 0.063<br>(0.005, 0.121)          | <b>0.035</b> |                           |         |                                     |                  |
| FD300                                                   | 0.002<br>(-0.002, 0.006)         | 0.215   |                           |         |                                     |         | 0.001<br>(-0.004, 0.006)         | 0.687        |                           |         |                                     |                  |
| Foveal                                                  | 0.000<br>(-0.002, 0.003)         | 0.727   | 0.002<br>(-0.000, 0.004)  | 0.060   | 0.001<br>(-0.002, 0.003)            | 0.642   | 0.002<br>(-0.001, 0.005)         | 0.174        | 0.004<br>(-0.000, 0.007)  | 0.052   | 0.003<br>(0.002, 0.005)             | <b>0.001</b>     |
| Parafoveal                                              | 0.003<br>(-0.001, 0.006)         | 0.129   | 0.003<br>(-0.002, 0.007)  | 0.286   | 0.001<br>(-0.001, 0.002)            | 0.547   | 0.005<br>(-0.002, 0.012)         | 0.175        | 0.002<br>(-0.007, 0.012)  | 0.599   | 0.003<br>(0.001, 0.004)             | <b>&lt;0.001</b> |
| Superior hemifield                                      | 0.003<br>(-0.001, 0.007)         | 0.116   | 0.004<br>(-0.002, 0.010)  | 0.202   | 0.001<br>(-0.001, 0.003)            | 0.347   | 0.007<br>(-0.000, 0.014)         | 0.063        | 0.003<br>(-0.007, 0.013)  | 0.499   | 0.003<br>(0.002, 0.005)             | <b>&lt;0.001</b> |
| Inferior hemifield                                      | 0.001<br>(-0.001, 0.004)         | 0.272   | 0.003<br>(-0.004, 0.004)  | 0.882   | 0.000<br>(-0.001, 0.002)            | 0.812   | 0.002<br>(-0.005, 0.008)         | 0.602        | 0.001<br>(-0.007, 0.008)  | 0.866   | 0.002<br>(0.000, 0.003)             | <b>0.013</b>     |
| Perifoveal                                              | 0.001<br>(-0.004, 0.005)         | 0.759   | 0.003<br>(-0.002, 0.007)  | 0.236   | -0.001<br>(-0.004, 0.002)           | 0.448   | 0.006<br>(-0.001, 0.013)         | 0.095        | 0.006<br>(-0.002, 0.013)  | 0.117   | 0.003<br>(0.001, 0.005)             | <b>0.013</b>     |
| Superior hemifield                                      | 0.001<br>(-0.004, 0.006)         | 0.659   | 0.004<br>(-0.001, 0.008)  | 0.118   | -0.001<br>(-0.003, 0.002)           | 0.591   | 0.007<br>(0.000, 0.014)          | <b>0.047</b> | 0.006<br>(-0.002, 0.013)  | 0.122   | 0.003<br>(0.001, 0.005)             | <b>0.001</b>     |
| Inferior hemifield                                      | 0.000<br>(-0.004, 0.004)         | 0.896   | 0.001<br>(-0.003, 0.005)  | 0.640   | -0.001<br>(-0.003, 0.001)           | 0.389   | 0.003<br>(-0.002, 0.009)         | 0.239        | 0.004<br>(-0.003, 0.010)  | 0.253   | 0.001<br>(-0.001, 0.003)            | 0.297            |
| Whole-image                                             | 0.002<br>(-0.004, 0.006)         | 0.563   | 0.002<br>(-0.003, 0.007)  | 0.371   | -0.001<br>(-0.004, 0.002)           | 0.378   | 0.006<br>(-0.001, 0.014)         | 0.105        | 0.007<br>(-0.001, 0.015)  | 0.091   | 0.003<br>(0.001, 0.005)             | <b>0.007</b>     |
| Superior hemifield                                      | 0.002<br>(-0.004, 0.008)         | 0.450   | 0.003<br>(-0.002, 0.008)  | 0.197   | -0.001<br>(-0.003, 0.002)           | 0.658   | 0.008<br>(0.000, 0.016)          | <b>0.043</b> | 0.007<br>(-0.002, 0.016)  | 0.117   | 0.003<br>(0.001, 0.005)             | <b>0.001</b>     |
| Inferior hemifield                                      | 0.001<br>(-0.003, 0.005)         | 0.700   | 0.001<br>(-0.003, 0.005)  | 0.610   | -0.001<br>(-0.003, 0.001)           | 0.284   | 0.003<br>(-0.003, 0.009)         | 0.294        | 0.005<br>(-0.002, 0.012)  | 0.154   | 0.001<br>(-0.001, 0.003)            | 0.204            |

\*Values are shown in  $\beta$  coefficient (95% CI). A positive  $\beta$  coefficient indicated worse logMAR VA. Statistically significant P values are shown in bold.

\*\*All models were adjusted for age and signal strength index. The FAZ area was additionally adjusted for axial length.

Abbreviations: CI = confidence interval; FAZ = foveal avascular zone; FD300 = foveal density 300; GCC = ganglion cell complex; OCT = optical coherence tomography; OCTA = optical coherence tomography angiography; POAG = primary open angle glaucoma; VD = vessel density
